# Supplementary material for: Arecoline Promotes Migration of A549 Lung Cancer Cells through Activating the EGFR/Src/FAK Pathway
Source: MDPI journal article supplement (doi:10.3390/toxins11040185), 2019-03-28
Supplement: s1 [file s1]

## Supplementary Materials: Arecoline promotes migration of A549 lung cancer cells through activating EGFR/Src/FAK pathway

Chih-Hsiang Chang, Mei-Chih Chen, Te-Huan Chiu, Yu-Hsuan Li, Wan-Chen Yu, Wan-Ling Liao, Muhammet Oner, Chang-Tze Ricky Yu, Chun-Chi Wu, Tsung-Ying Yang, Chieh-Lin Jerry Teng, Kun-Yuan Chiu, Kun-Chien Chen, Hsin-Yi Wang, Chia-Herng Yue, Chih-Ho Lai, Jer-Tsong Hsieh and Ho Lin

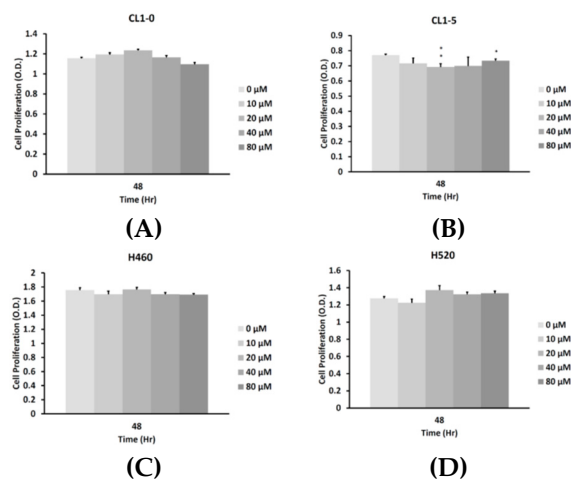

**Figure S1.** The effects of Arecoline on viability of different lung cancer cell lines. MTT assay was performed to detect cell viability. Different concentrations of Arecoline were administrated to CL1-0 (A), CL1-5 (B), H460 (C), and H520 (D) cells and the cell proliferation was measured at 48 hours. (\*:  $p < 0.05$ ; \*\*:  $p < 0.01$ , compared with control groups).

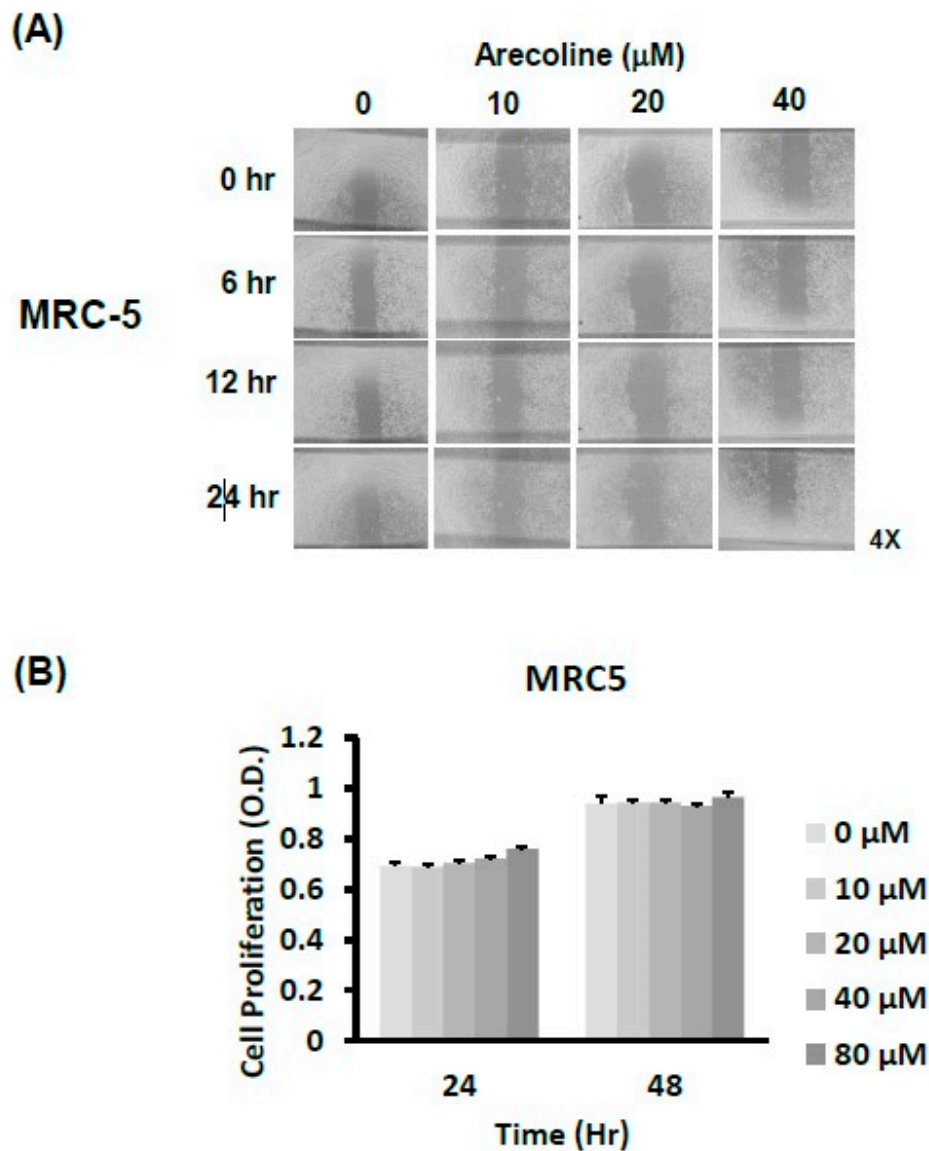

**Figure S2.** Arecoline does not affect viability and migration MRC-5 cells. **(A)** Cell motility was measured by cell migration assay. MRC-5 normal lung cells were seeded in ibidi Culture- Insert with cell density:  $5 \times 10^4$  cells/well. Cell images were taken at indicated time points after treated with a variant concentration of Arecoline. The result shows no apparent response of Arecoline to MRC-5 migration. **(B)** MTT assay was performed to detect cell viability. Different concentrations of Arecoline were administrated to MRC-5 cells and the cell proliferation was measured at 24 and 48 hours. The result shows no apparent response of Arecoline to MRC-5 viability.

**(A)**

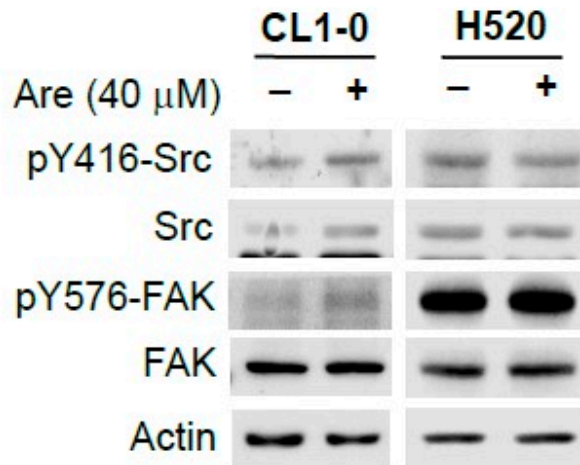

**(B)**

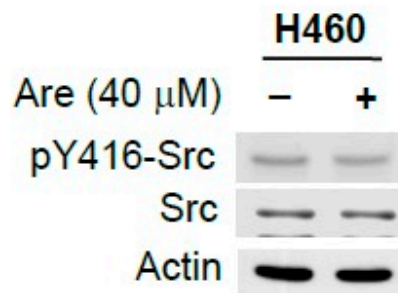

**Figure S3.** The effects of Arecoline on Src and FAK in CL1-0, H520 (A), and H460 cells (B). After treated with 40  $\mu$ M Arecoline for 24 hours, cells were collected and proteins were analyzed by immunoblotting. The expression and phosphorylations of c-Src (p-Y416-Src) and FAK (p-Y397-FAK) as well as total Src/FAK proteins were measured. Actin served as the internal control.
